# Supplementary material
Source: bioRxiv or medRxiv preprint supplement (http://medrxiv.stage.highwire.org/highwire/filestream/81107/field_highwire_adjunct_files/0/2020.05.13.20100867-1.pdf)
Supplement: Supplementary file [file 2020.05.13.20100867-1.pdf]

## MODULES INVOLVED WITH ATRIAL FIBRILLATION

## Supplementary Figures

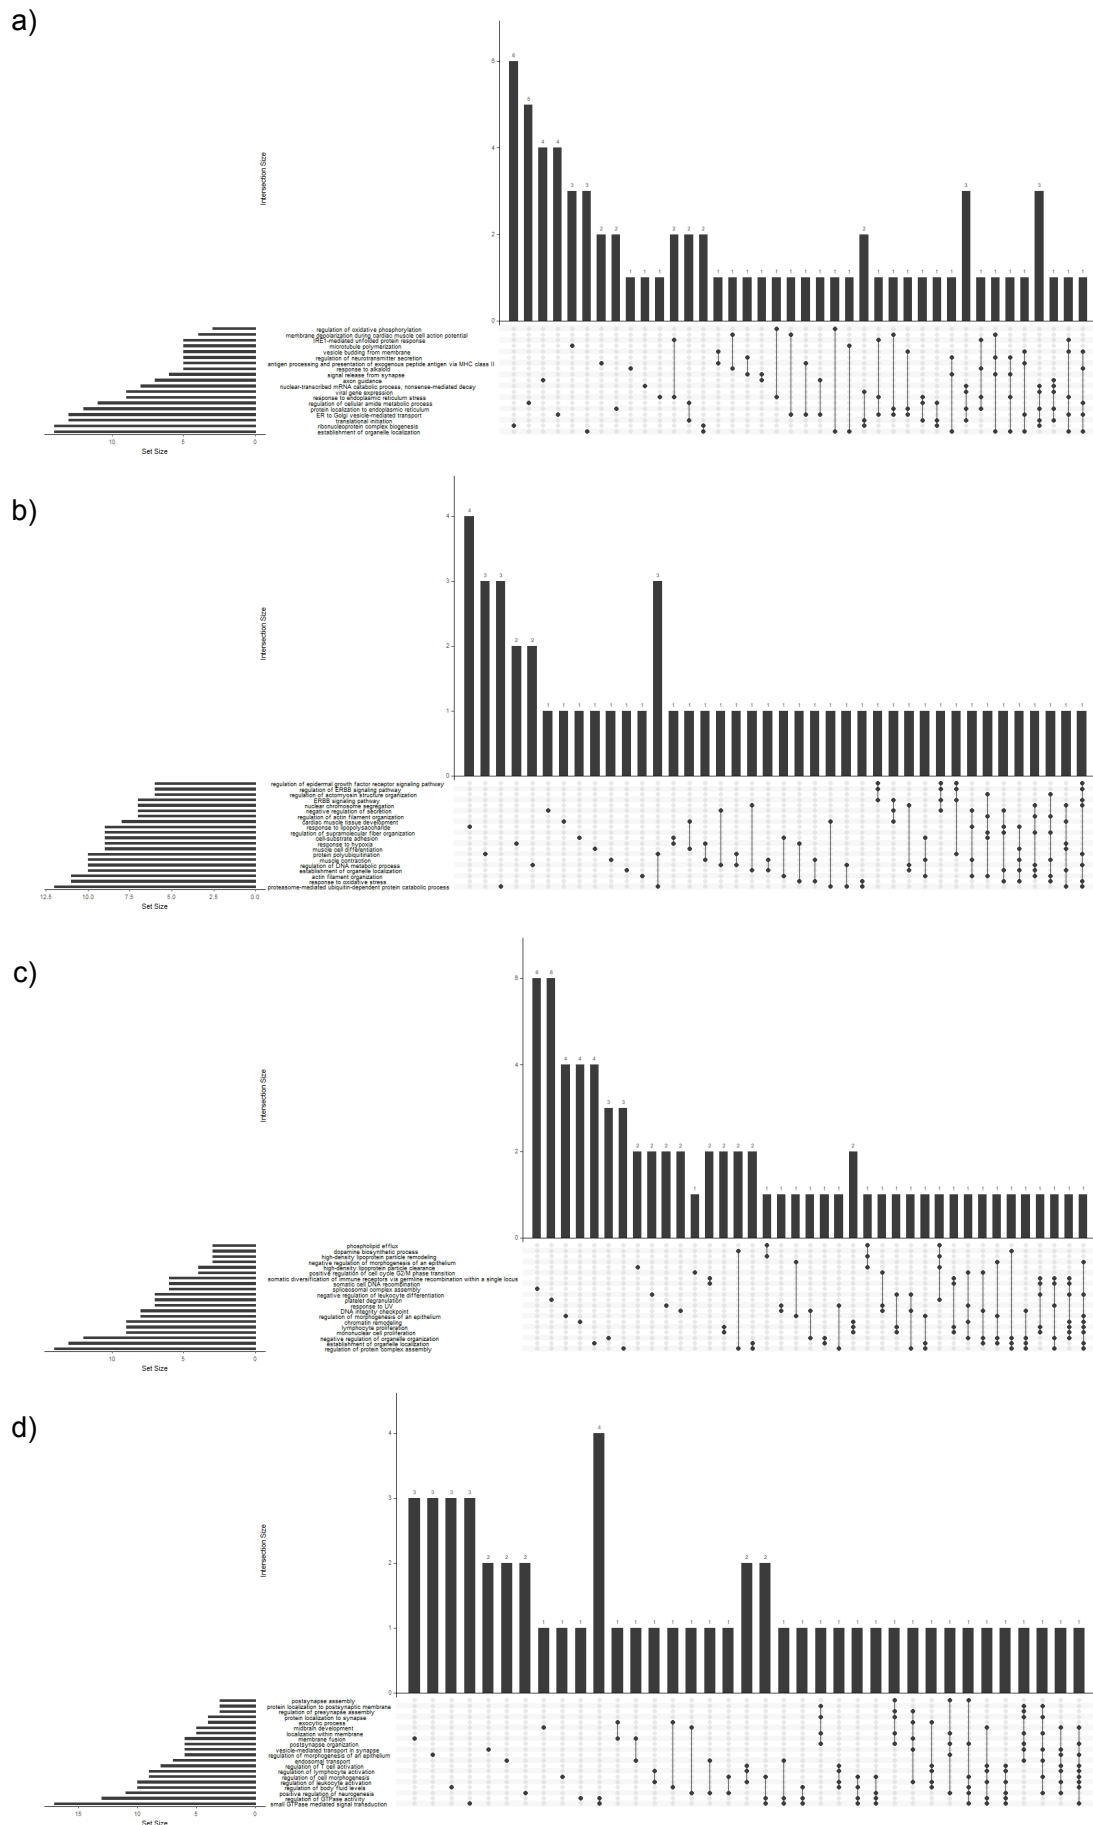

**Fig. S1** Set size and gene intersections for the top 20 pathways enriched for a) Cluster 1, b) Cluster 2, c) Cluster 3, and d) Cluster 4.
